# Supplementary material for: Global evidence of rapid urban growth in flood zones since 1985
Source: Research Square preprint supplement (doi:10.21203/rs.3.rs-1460344/v1), 2022-03-22
Supplement: Supplementary file 1 [file 31cdfc7b1c76eb3ae40ec9f3.docx]

Global evidence of rapid urban growth in flood zones since 1985

*Supplementary material*

**Figure S.1. Year on year settlement growth (%)**


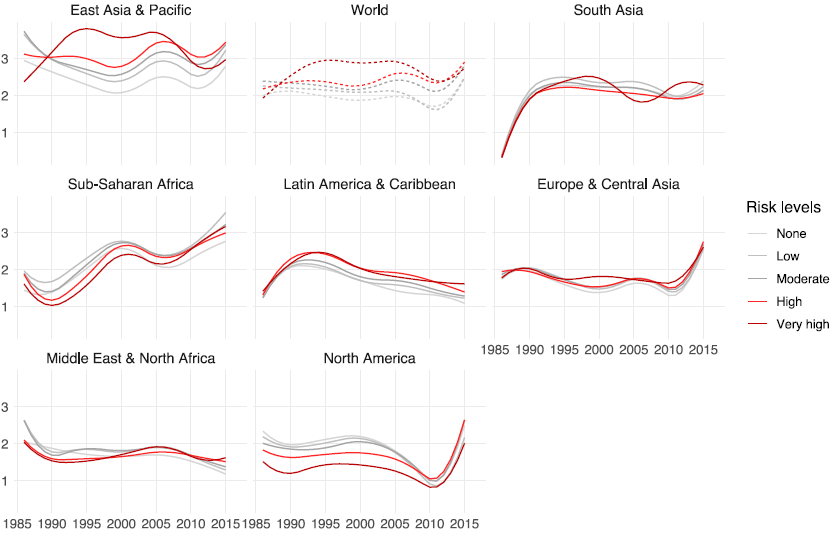


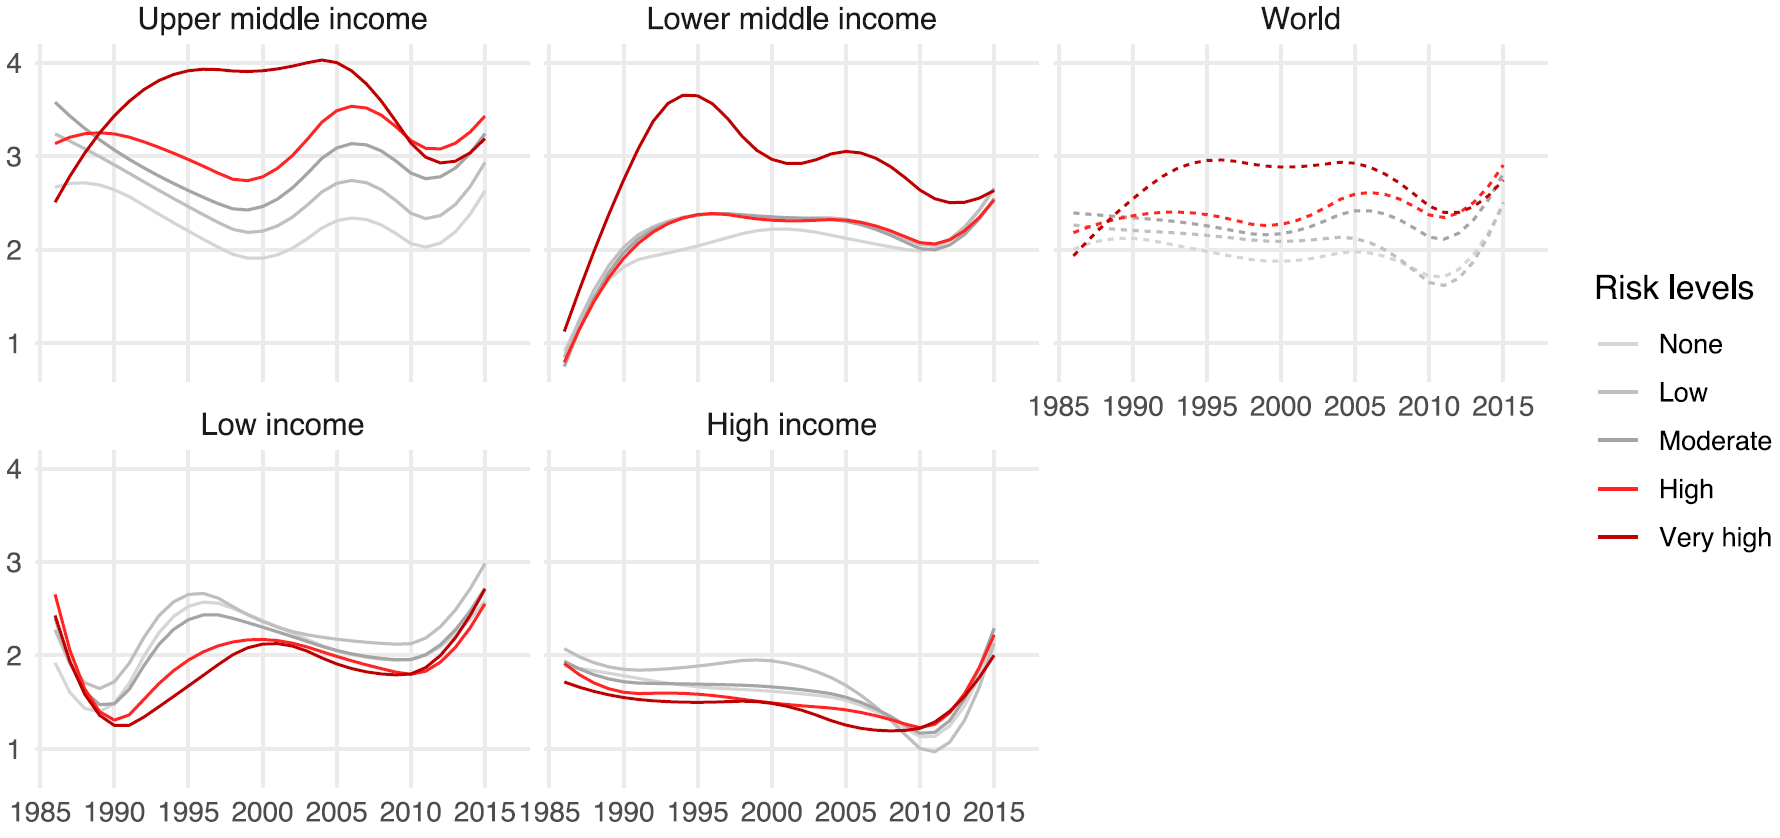


**Relative accuracy of the WSF-Evo dataset (Kappa coefficients)**

Figure S.2. present the kappa coefficient for the WSF-evolution dataset used in this study, as well as GAUD, GAIA, GISA and GHSL. For the purpose of comparison, we define settlements as the combination of buildings and building lots. We define blocks of 3-by-3 grid cells as the spatial assessment unit, thus yielding units of 9 cells with 30-by-30 meter size each. For 1990, 1995, 2000, 2005, 2010 and 2015, we label about 200,000 30x30-meter reference cells distributed over 100 sites around the world, summing up to about 1.2 million validation samples overall. We then evaluate the kappa coefficient for three separate assessment criteria:

1. Criterion 1: For each cell, positive agreement occurs only for matching labels between the classification and the reference;
2. Criterion 2: For each block, a majority rule is applied over the entire 3-by-3 block of both the classification and the reference; if the final labels match, then the agreement is positive;
3. Criterion 3: Each block is labelled as *settlement only*, if it contains at least one cell marked as settlement; if the final labels match, then the agreement is positive.

Kappa coefficients for WSF-Evo are consistently higher than comparator layers across all years and all three assessment criteria. For assessment criteria 1 and 2, kappa coefficients for WSF-Evo increase over time. For Criterion 3, WSF-Evo exhibits a steady Kappa of 0.8 on average. This means that wherever the WSF-Evo settlement data is positive, there is a high likelihood that within the reference block there is a pixel belonging to the settlement class. This suggests that WSF-Evo is well suited for detecting built-up areas not only in urban regions, but also in less densely settled rural regions.


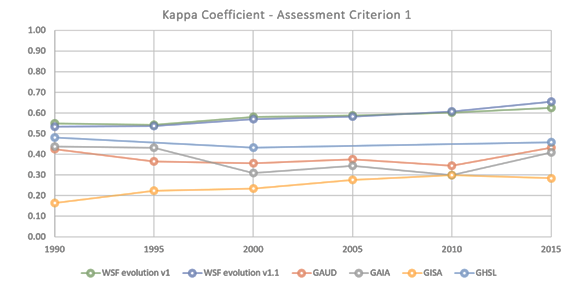


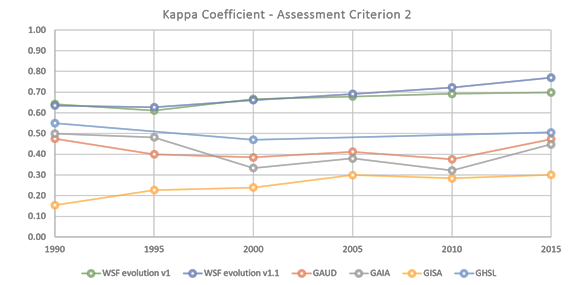


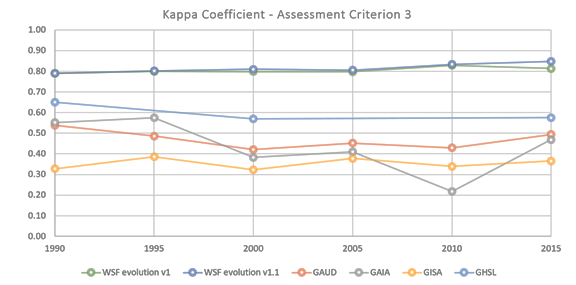


**Country level summary statistics**

This table provides a country-level breakdown of results. Results show total built-up areas, i.e. settlement extent (SE). Safe SE refers to areas that are not estimated to experience any flooding during a 1-in-100 year flood event. High risk (or very high) SE denotes areas that are estimated to experience inundation depths over 0.5 meters (or 1.5 meters) during a 1-in-100 year flood event.

|  | Total SE | | | Safe SE | | | High risk SE | | | Very high risk SE | | |
| --- | --- | --- | --- | --- | --- | --- | --- | --- | --- | --- | --- | --- |
|  | **1985** *(km2)* | **2015**  *(km2)* | **Change** *(%)* | **1985** *(km2)* | **2015** *(km2)* | **Change** *(km2)* | **1985** *(km2)* | **2015** *(km2)* | **Change** *(%)* | **1985** *(km2)* | **2015** *(km2)* | **Change** *(%)* |
| **World** | 692,629.5 | 1,284,036.0 | 85.4 | 445,001.8 | 799,493.3 | 79.7 | 68,188.8 | 144,631.7 | 112.1 | 29,999.2 | 66,477.0 | 121.6 |
| China | 100,806.6 | 270,440.2 | 168.3 | 61,190.2 | 148,952.5 | 143.4 | 15,708.7 | 50,693.3 | 222.7 | 8,142.7 | 26,561.6 | 226.2 |
| USA | 90,361.7 | 155,721.3 | 72.3 | 36,571.5 | 64,527.7 | 76.4 | 4,412.8 | 6,847.3 | 55.2 | 2,026.4 | 2,963.4 | 46.2 |
| India | 43,901.1 | 80,726.0 | 83.9 | 28,195.3 | 51,973.4 | 84.3 | 4,744.7 | 8,183.0 | 72.5 | 1,401.5 | 2,330.3 | 66.3 |
| Russia | 29,108.3 | 53,714.5 | 84.5 | 23,687.9 | 42,954.0 | 81.3 | 1,267.4 | 2,714.2 | 114.2 | 445.7 | 970.0 | 117.7 |
| Japan | 29,532.2 | 41,020.1 | 38.9 | 17,114.1 | 23,848.0 | 39.3 | 6,266.9 | 8,551.0 | 36.4 | 3,661.1 | 4,938.6 | 34.9 |
| Indonesia | 22,117.9 | 37,149.1 | 68.0 | 12,777.0 | 21,536.3 | 68.6 | 2,495.1 | 4,466.8 | 79.0 | 719.0 | 1,375.9 | 91.4 |
| Brazil | 19,086.4 | 32,750.4 | 71.6 | 15,865.2 | 26,979.9 | 70.1 | 1,170.7 | 2,125.2 | 81.5 | 513.1 | 913.9 | 78.1 |
| France | 19,859.8 | 31,061.5 | 56.4 | 14,758.9 | 23,347.5 | 58.2 | 2,116.5 | 3,069.3 | 45.0 | 1,068.7 | 1,540.7 | 44.2 |
| Germany | 19,694.6 | 29,890.3 | 51.8 | 14,199.7 | 21,578.2 | 52.0 | 1,883.4 | 2,925.6 | 55.3 | 751.8 | 1,225.6 | 63.0 |
| Thailand | 12,256.3 | 24,488.4 | 99.8 | 7,184.6 | 13,215.8 | 83.9 | 1,711.4 | 4,205.5 | 145.7 | 552.6 | 1,310.0 | 137.1 |
| Italy | 15,486.0 | 22,907.1 | 47.9 | 9,995.7 | 14,381.4 | 43.9 | 1,374.4 | 2,225.8 | 61.9 | 506.9 | 839.6 | 65.6 |
| Ukraine | 13,014.2 | 22,695.5 | 74.4 | 10,935.3 | 18,749.2 | 71.5 | 516.4 | 1,046.0 | 102.6 | 181.9 | 385.7 | 112.0 |
| Mexico | 12,001.6 | 20,591.8 | 71.6 | 7,272.7 | 12,332.8 | 69.6 | 758.2 | 1,417.8 | 87.0 | 204.3 | 380.5 | 86.3 |
| Nigeria | 9,401.2 | 19,321.1 | 105.5 | 7,235.8 | 14,772.0 | 104.2 | 499.7 | 1,020.3 | 104.2 | 134.0 | 278.4 | 107.7 |
| Vietnam | 5,251.4 | 16,617.8 | 216.4 | 2,241.2 | 6,239.1 | 178.4 | 1,895.4 | 7,077.9 | 273.4 | 1,332.5 | 5,189.9 | 289.5 |
| Poland | 8,154.2 | 15,924.4 | 95.3 | 6,462.5 | 12,410.4 | 92.0 | 385.4 | 853.1 | 121.3 | 79.0 | 185.6 | 134.9 |
| UK | 10,522.4 | 15,222.0 | 44.7 | 8,648.3 | 12,412.5 | 43.5 | 720.2 | 1,081.2 | 50.1 | 275.6 | 421.9 | 53.1 |
| Canada | 9,223.9 | 15,132.8 | 64.1 | 5,369.5 | 8,948.2 | 66.7 | 490.7 | 791.2 | 61.2 | 186.0 | 294.5 | 58.4 |
| Australia | 9,227.6 | 14,132.4 | 53.2 | 7,615.8 | 11,500.4 | 51.0 | 396.9 | 664.8 | 67.5 | 133.8 | 221.2 | 65.3 |
| Spain | 8,396.7 | 13,960.7 | 66.3 | 6,540.3 | 10,705.7 | 63.7 | 494.6 | 876.9 | 77.3 | 189.5 | 334.0 | 76.3 |
| Turkey | 6,884.9 | 13,408.1 | 94.7 | 4,569.0 | 8,702.1 | 90.5 | 474.3 | 1,021.2 | 115.3 | 142.4 | 294.0 | 106.5 |
| Iran | 7,258.2 | 12,657.9 | 74.4 | 4,187.1 | 7,265.7 | 73.5 | 405.9 | 773.5 | 90.6 | 147.8 | 276.2 | 86.9 |
| South Africa | 7,619.6 | 12,279.3 | 61.2 | 6,428.2 | 10,297.8 | 60.2 | 135.4 | 246.0 | 81.7 | 35.7 | 74.5 | 108.8 |
| Pakistan | 5,936.9 | 10,567.3 | 78.0 | 3,245.8 | 5,728.8 | 76.5 | 894.6 | 1,548.1 | 73.1 | 131.2 | 247.8 | 88.9 |
| Bangladesh | 5,362.0 | 10,217.4 | 90.6 | 2,051.0 | 3,878.1 | 89.1 | 1,994.3 | 3,985.1 | 99.8 | 1,173.4 | 2,392.2 | 103.9 |
| Argentina | 6,209.5 | 9,441.9 | 52.1 | 3,879.3 | 5,749.4 | 48.2 | 234.9 | 429.9 | 83.0 | 37.6 | 72.3 | 92.1 |
| Uzbekistan | 5,719.1 | 9,292.7 | 62.5 | 3,671.8 | 5,860.2 | 59.6 | 249.0 | 403.6 | 62.1 | 44.7 | 73.3 | 63.9 |
| Rep. of Korea | 4,112.0 | 8,777.8 | 113.5 | 2,685.1 | 5,754.3 | 114.3 | 598.6 | 1,311.7 | 119.1 | 285.1 | 623.0 | 118.5 |
| Romania | 5,147.9 | 8,711.8 | 69.2 | 3,367.2 | 5,650.5 | 67.8 | 522.4 | 900.7 | 72.4 | 129.9 | 226.0 | 74.0 |
| Malaysia | 4,340.4 | 8,286.8 | 90.9 | 2,684.4 | 5,147.5 | 91.8 | 644.1 | 1,247.9 | 93.7 | 257.8 | 497.4 | 93.0 |
| Philippines | 4,355.9 | 6,717.7 | 54.2 | 2,333.4 | 3,590.7 | 53.9 | 510.6 | 818.6 | 60.3 | 124.5 | 200.4 | 61.0 |
| Saudi Arabia | 3,536.0 | 6,708.7 | 89.7 | 2,916.9 | 5,449.2 | 86.8 | 114.9 | 231.8 | 101.8 | 26.4 | 53.8 | 103.5 |
| Egypt | 4,198.1 | 6,278.3 | 49.6 | 2,459.7 | 3,677.0 | 49.5 | 1,196.8 | 1,798.9 | 50.3 | 452.2 | 673.1 | 48.8 |
| Kazakhstan | 3,293.4 | 5,584.6 | 69.6 | 2,237.5 | 3,694.9 | 65.1 | 163.3 | 323.5 | 98.1 | 23.2 | 52.4 | 125.8 |
| Portugal | 3,171.4 | 5,325.1 | 67.9 | 2,780.8 | 4,633.9 | 66.6 | 96.1 | 175.5 | 82.7 | 38.0 | 70.3 | 85.1 |
| Myanmar | 3,413.2 | 5,280.3 | 54.7 | 2,112.2 | 3,208.2 | 51.9 | 486.8 | 826.1 | 69.7 | 217.4 | 369.9 | 70.2 |
| Hungary | 3,826.3 | 5,244.9 | 37.1 | 2,791.5 | 3,771.9 | 35.1 | 217.8 | 336.8 | 54.7 | 43.5 | 73.4 | 68.7 |
| Tanzania | 2,248.6 | 4,779.2 | 112.5 | 1,799.5 | 3,738.0 | 107.7 | 57.2 | 127.2 | 122.4 | 11.8 | 25.4 | 114.8 |
| Czech Rep. | 3,105.9 | 4,764.6 | 53.4 | 2,240.6 | 3,445.7 | 53.8 | 289.3 | 451.5 | 56.1 | 97.3 | 152.8 | 57.0 |
| Algeria | 2,734.3 | 4,711.7 | 72.3 | 2,118.1 | 3,682.1 | 73.8 | 104.7 | 168.5 | 61.0 | 24.5 | 40.1 | 63.8 |
| Netherlands | 2,845.8 | 4,706.8 | 65.4 | 1,196.9 | 1,767.1 | 47.6 | 1,226.5 | 2,243.1 | 82.9 | 1,002.7 | 1,869.6 | 86.5 |
| Belarus | 2,634.8 | 4,678.2 | 77.6 | 2,358.9 | 4,123.0 | 74.8 | 44.6 | 99.2 | 122.3 | 9.3 | 21.2 | 128.7 |
| Ghana | 2,462.2 | 4,540.4 | 84.4 | 2,064.5 | 3,781.3 | 83.2 | 101.7 | 193.7 | 90.5 | 30.6 | 61.7 | 102.0 |
| Taiwan, China | 2,934.5 | 4,463.6 | 52.1 | 1,619.5 | 2,296.8 | 41.8 | 408.5 | 670.8 | 64.2 | 163.6 | 276.6 | 69.0 |
| Belgium | 2,676.1 | 4,438.3 | 65.8 | 1,927.4 | 3,191.1 | 65.6 | 306.1 | 506.4 | 65.4 | 169.5 | 286.2 | 68.9 |
| Venezuela | 2,883.3 | 4,353.3 | 51.0 | 1,830.3 | 2,696.8 | 47.3 | 196.4 | 322.3 | 64.1 | 59.8 | 96.9 | 62.1 |
| Iraq | 2,604.1 | 4,329.0 | 66.2 | 1,406.9 | 2,311.0 | 64.3 | 570.5 | 899.1 | 57.6 | 150.3 | 251.7 | 67.4 |
| Greece | 2,803.7 | 4,289.9 | 53.0 | 1,852.0 | 2,743.2 | 48.1 | 156.0 | 264.2 | 69.4 | 27.6 | 48.9 | 77.3 |
| Dem. Rep. of Congo | 2,664.1 | 4,135.3 | 55.2 | 2,307.4 | 3,523.8 | 52.7 | 108.6 | 196.3 | 80.7 | 62.8 | 115.1 | 83.3 |
| Zambia | 1,619.5 | 3,816.3 | 135.6 | 1,303.9 | 2,947.2 | 126.0 | 21.9 | 72.4 | 230.9 | 6.2 | 22.6 | 266.5 |
| Sweden | 2,487.1 | 3,815.9 | 53.4 | 2,065.9 | 3,179.2 | 53.9 | 129.2 | 189.3 | 46.6 | 46.7 | 67.9 | 45.4 |
| Syria | 2,360.7 | 3,551.0 | 50.4 | 1,739.8 | 2,566.1 | 47.5 | 88.1 | 148.6 | 68.7 | 18.3 | 34.3 | 87.7 |
| Austria | 1,976.5 | 3,541.9 | 79.2 | 1,134.6 | 2,077.9 | 83.1 | 382.0 | 666.2 | 74.4 | 186.8 | 332.0 | 77.7 |
| Bulgaria | 2,305.5 | 3,199.5 | 38.8 | 1,520.4 | 2,113.1 | 39.0 | 187.4 | 268.6 | 43.3 | 50.6 | 76.6 | 51.3 |
| Colombia | 2,019.3 | 3,061.1 | 51.6 | 1,228.8 | 1,800.9 | 46.6 | 263.7 | 432.5 | 64.0 | 117.7 | 197.1 | 67.4 |
| Mozambique | 1,079.7 | 3,049.5 | 182.4 | 932.1 | 2,582.9 | 177.1 | 38.8 | 97.2 | 150.3 | 11.1 | 27.4 | 147.0 |
| Denmark | 1,912.5 | 3,028.1 | 58.3 | 1,621.6 | 2,532.2 | 56.2 | 77.5 | 142.6 | 84.0 | 28.2 | 55.0 | 95.0 |
| Azerbaijan | 1,590.9 | 3,009.5 | 89.2 | 973.8 | 1,791.4 | 84.0 | 93.8 | 159.8 | 70.5 | 15.8 | 26.2 | 66.3 |
| Côte d'Ivoire | 1,619.4 | 2,894.9 | 78.8 | 1,416.6 | 2,526.9 | 78.4 | 61.9 | 112.7 | 82.0 | 27.9 | 49.1 | 76.1 |
| Serbia | 1,747.1 | 2,786.8 | 59.5 | 1,179.3 | 1,852.4 | 57.1 | 159.7 | 281.9 | 76.5 | 48.0 | 89.6 | 86.8 |
| Mali | 972.6 | 2,754.6 | 183.2 | 492.7 | 1,445.3 | 193.3 | 129.0 | 313.3 | 142.9 | 43.1 | 99.1 | 129.8 |
| Morocco | 1,605.5 | 2,739.1 | 70.6 | 1,161.2 | 1,951.7 | 68.1 | 62.8 | 108.0 | 72.0 | 15.5 | 27.0 | 74.4 |
| Finland | 1,459.7 | 2,664.7 | 82.6 | 1,245.1 | 2,264.7 | 81.9 | 64.2 | 112.4 | 75.1 | 21.3 | 36.2 | 70.3 |
| Chile | 1,482.3 | 2,616.0 | 76.5 | 861.4 | 1,549.4 | 79.9 | 79.1 | 144.8 | 83.1 | 20.1 | 38.7 | 92.3 |
| Tunisia | 1,442.6 | 2,555.2 | 77.1 | 1,105.9 | 1,950.7 | 76.4 | 47.4 | 79.7 | 68.0 | 9.6 | 15.9 | 65.9 |
| Slovak Rep. | 1,733.5 | 2,443.3 | 40.9 | 944.4 | 1,328.9 | 40.7 | 307.0 | 445.1 | 45.0 | 87.2 | 131.6 | 51.0 |
| Kenya | 1,499.0 | 2,438.7 | 62.7 | 1,266.2 | 2,012.7 | 59.0 | 41.6 | 76.8 | 84.5 | 12.5 | 22.2 | 77.7 |
| Sudan | 1,561.9 | 2,396.3 | 53.4 | 849.8 | 1,385.5 | 63.0 | 331.7 | 425.5 | 28.3 | 150.8 | 191.0 | 26.7 |
| Malawi | 1,366.6 | 2,376.4 | 73.9 | 1,155.6 | 1,968.6 | 70.3 | 25.0 | 50.4 | 101.4 | 5.6 | 12.2 | 116.9 |
| Uganda | 1,094.6 | 2,355.5 | 115.2 | 1,023.6 | 2,168.0 | 111.8 | 15.7 | 39.3 | 150.9 | 4.6 | 11.5 | 149.6 |
| Switzerland | 1,439.0 | 2,354.9 | 63.6 | 905.1 | 1,484.4 | 64.0 | 237.3 | 402.5 | 69.6 | 145.6 | 254.4 | 74.7 |
| Cameroon | 1,651.3 | 2,354.8 | 42.6 | 1,372.2 | 1,916.3 | 39.7 | 79.3 | 126.3 | 59.3 | 27.7 | 44.5 | 60.7 |
| Peru | 1,508.6 | 2,184.2 | 44.8 | 1,168.7 | 1,624.9 | 39.0 | 90.4 | 158.1 | 74.8 | 47.2 | 84.0 | 78.2 |
| Sri Lanka | 1,244.7 | 2,169.4 | 74.3 | 910.6 | 1,586.8 | 74.3 | 120.2 | 218.9 | 82.1 | 54.9 | 103.5 | 88.7 |
| Ethiopia | 963.3 | 2,038.5 | 111.6 | 784.0 | 1,666.7 | 112.6 | 32.4 | 69.0 | 113.1 | 9.5 | 21.0 | 121.2 |
| Croatia | 1,230.7 | 2,033.6 | 65.2 | 802.9 | 1,310.2 | 63.2 | 194.7 | 336.5 | 72.8 | 94.9 | 172.5 | 81.7 |
| Cambodia | 544.1 | 1,927.2 | 254.2 | 303.6 | 1,124.7 | 270.5 | 84.4 | 286.6 | 239.5 | 32.9 | 115.5 | 250.9 |
| Tajikistan | 1,160.3 | 1,917.2 | 65.2 | 591.8 | 981.0 | 65.8 | 81.2 | 136.3 | 67.7 | 25.3 | 44.6 | 76.6 |
| New Zealand | 1,463.9 | 1,852.6 | 26.6 | 1,006.2 | 1,266.3 | 25.8 | 110.6 | 141.1 | 27.5 | 32.4 | 41.6 | 28.6 |
| Libya | 1,142.9 | 1,843.1 | 61.3 | 897.1 | 1,437.2 | 60.2 | 51.0 | 84.9 | 66.4 | 12.3 | 22.5 | 82.7 |
| Moldova | 1,327.8 | 1,830.0 | 37.8 | 1,126.4 | 1,546.3 | 37.3 | 56.8 | 85.8 | 51.1 | 17.3 | 27.5 | 58.8 |
| Burkina Faso | 607.3 | 1,804.5 | 197.1 | 406.0 | 1,183.3 | 191.4 | 14.4 | 43.1 | 198.7 | 0.8 | 3.1 | 287.9 |
| Benin | 779.8 | 1,798.8 | 130.7 | 605.1 | 1,399.9 | 131.3 | 17.8 | 42.7 | 140.0 | 3.8 | 9.3 | 144.7 |
| UAE | 694.8 | 1,765.6 | 154.1 | 559.9 | 1,405.6 | 151.0 | 31.4 | 121.4 | 286.6 | 6.7 | 34.4 | 412.7 |
| Ecuador | 1,040.1 | 1,672.5 | 60.8 | 679.8 | 1,028.5 | 51.3 | 113.0 | 229.8 | 103.4 | 39.6 | 80.2 | 102.5 |
| Ireland | 770.6 | 1,663.1 | 115.8 | 610.7 | 1,311.0 | 114.7 | 44.9 | 98.8 | 120.2 | 16.2 | 34.2 | 111.5 |
| Angola | 1,072.3 | 1,649.7 | 53.8 | 936.9 | 1,415.8 | 51.1 | 21.1 | 43.6 | 106.3 | 3.5 | 9.3 | 165.9 |
| Madagascar | 936.7 | 1,630.4 | 74.1 | 732.2 | 1,279.9 | 74.8 | 84.3 | 140.9 | 67.2 | 41.7 | 67.9 | 63.0 |
| Cuba | 1,152.4 | 1,574.9 | 36.7 | 845.9 | 1,135.4 | 34.2 | 42.8 | 64.7 | 51.1 | 14.6 | 21.3 | 45.8 |
| Lithuania | 922.3 | 1,571.6 | 70.4 | 797.4 | 1,349.3 | 69.2 | 26.3 | 46.4 | 76.2 | 8.2 | 13.8 | 69.0 |
| Guinea | 752.9 | 1,569.8 | 108.5 | 642.2 | 1,299.4 | 102.3 | 31.1 | 76.1 | 144.5 | 11.4 | 28.4 | 150.5 |
| Kyrgyzstan | 826.8 | 1,561.4 | 88.9 | 403.0 | 760.6 | 88.7 | 41.9 | 84.0 | 100.6 | 11.7 | 25.9 | 120.8 |
| Turkmenistan | 1,063.6 | 1,560.5 | 46.7 | 623.0 | 905.8 | 45.4 | 147.9 | 221.8 | 50.0 | 20.7 | 32.7 | 57.9 |
| Israel | 1,029.5 | 1,536.7 | 49.3 | 908.1 | 1,316.1 | 44.9 | 17.1 | 32.8 | 91.3 | 2.4 | 5.1 | 109.8 |
| Norway | 807.7 | 1,520.7 | 88.3 | 655.3 | 1,261.5 | 92.5 | 67.4 | 109.2 | 62.0 | 43.4 | 68.3 | 57.3 |
| Botswana | 697.2 | 1,488.4 | 113.5 | 510.8 | 1,069.4 | 109.4 | 22.2 | 46.8 | 110.9 | 2.7 | 7.5 | 175.9 |
| Georgia | 948.2 | 1,415.2 | 49.3 | 560.5 | 830.4 | 48.2 | 80.9 | 121.5 | 50.2 | 30.0 | 43.3 | 44.3 |
| Guatemala | 980.4 | 1,394.2 | 42.2 | 750.8 | 1,025.0 | 36.5 | 53.7 | 86.5 | 61.0 | 22.2 | 34.3 | 54.4 |
| North Korea | 765.5 | 1,302.3 | 70.1 | 467.4 | 803.2 | 71.8 | 144.4 | 255.3 | 76.7 | 66.6 | 124.3 | 86.6 |
| Afghanistan | 723.5 | 1,228.0 | 69.7 | 401.7 | 669.7 | 66.7 | 44.1 | 78.6 | 78.1 | 10.0 | 21.0 | 109.3 |
| Bolivia | 671.9 | 1,217.0 | 81.1 | 395.3 | 682.1 | 72.5 | 38.0 | 73.6 | 93.6 | 8.7 | 19.3 | 121.7 |
| Senegal | 621.4 | 1,205.7 | 94.0 | 447.7 | 852.2 | 90.3 | 37.9 | 70.7 | 86.3 | 13.8 | 21.1 | 52.7 |
| Puerto Rico (U.S.) | 850.1 | 1,174.8 | 38.2 | 640.3 | 892.5 | 39.4 | 44.6 | 60.1 | 34.8 | 11.3 | 16.1 | 41.9 |
| Lebanon | 793.6 | 1,137.6 | 43.4 | 681.1 | 958.0 | 40.6 | 20.2 | 32.1 | 59.5 | 5.8 | 9.4 | 61.9 |
| Nepal | 512.9 | 1,084.9 | 111.5 | 286.6 | 586.9 | 104.8 | 45.9 | 106.2 | 131.1 | 8.8 | 25.2 | 186.1 |
| Dominican Rep. | 548.4 | 1,080.8 | 97.1 | 368.3 | 723.3 | 96.4 | 25.6 | 53.3 | 108.5 | 5.6 | 12.2 | 118.7 |
| Laos | 380.1 | 1,041.8 | 174.1 | 170.7 | 501.7 | 193.8 | 161.7 | 389.2 | 140.7 | 129.1 | 299.4 | 131.9 |
| Zimbabwe | 666.4 | 1,033.9 | 55.1 | 580.8 | 882.1 | 51.9 | 12.6 | 22.9 | 82.0 | 4.8 | 8.1 | 69.0 |
| Jordan | 789.8 | 1,001.1 | 26.8 | 711.3 | 891.9 | 25.4 | 11.7 | 15.0 | 27.4 | 3.2 | 3.8 | 17.0 |
| Bosnia and Herzegovina | 426.6 | 979.2 | 129.6 | 242.4 | 560.8 | 131.3 | 85.3 | 191.1 | 124.0 | 39.0 | 85.8 | 120.2 |
| Oman | 763.1 | 947.3 | 24.1 | 590.0 | 745.2 | 26.3 | 17.7 | 21.3 | 20.4 | 2.2 | 2.6 | 18.5 |
| Paraguay | 471.3 | 941.9 | 99.8 | 409.9 | 808.7 | 97.3 | 8.1 | 22.9 | 181.8 | 2.8 | 9.1 | 228.4 |
| Yemen | 532.9 | 852.8 | 60.0 | 406.6 | 658.7 | 62.0 | 12.6 | 21.1 | 67.7 | 1.6 | 2.9 | 81.1 |
| Armenia | 574.6 | 827.7 | 44.0 | 355.3 | 503.8 | 41.8 | 40.3 | 60.4 | 49.8 | 12.7 | 18.7 | 47.3 |
| Slovenia | 468.1 | 756.7 | 61.7 | 299.7 | 481.3 | 60.6 | 71.6 | 120.8 | 68.7 | 33.2 | 55.4 | 66.8 |
| Honduras | 429.7 | 747.5 | 74.0 | 254.7 | 429.8 | 68.7 | 34.2 | 62.6 | 83.0 | 8.9 | 14.9 | 66.9 |
| Costa Rica | 443.5 | 743.4 | 67.6 | 301.6 | 493.5 | 63.6 | 29.9 | 53.4 | 78.6 | 9.1 | 16.3 | 78.6 |
| Latvia | 479.0 | 735.5 | 53.5 | 373.1 | 567.9 | 52.2 | 49.6 | 77.5 | 56.4 | 22.2 | 36.8 | 65.5 |
| Uruguay | 479.1 | 723.0 | 50.9 | 420.0 | 627.0 | 49.3 | 7.8 | 14.7 | 87.6 | 2.3 | 4.2 | 83.1 |
| Albania | 338.2 | 707.2 | 109.1 | 182.0 | 367.0 | 101.7 | 60.6 | 125.6 | 107.2 | 23.1 | 46.5 | 101.6 |
| West Bank and Gaza | 590.7 | 707.0 | 19.7 | 548.5 | 652.0 | 18.9 | 6.5 | 8.5 | 31.4 | 1.7 | 2.1 | 23.6 |
| Togo | 417.5 | 685.3 | 64.1 | 347.9 | 568.7 | 63.4 | 9.5 | 17.2 | 81.0 | 1.6 | 3.4 | 116.8 |
| Sierra Leone | 331.6 | 678.0 | 104.4 | 269.7 | 549.1 | 103.6 | 24.9 | 49.8 | 100.0 | 12.2 | 24.2 | 97.7 |
| Cyprus | 369.4 | 613.5 | 66.1 | 267.6 | 441.8 | 65.1 | 10.3 | 19.1 | 84.9 | 1.9 | 4.0 | 107.8 |
| Jamaica | 373.8 | 597.9 | 60.0 | 263.4 | 433.9 | 64.8 | 17.4 | 27.5 | 57.9 | 5.1 | 8.6 | 67.9 |
| Rwanda | 326.5 | 585.5 | 79.3 | 282.6 | 517.5 | 83.1 | 9.7 | 15.3 | 57.0 | 3.2 | 5.2 | 62.4 |
| Panama | 328.7 | 569.1 | 73.1 | 263.5 | 446.3 | 69.4 | 16.0 | 32.9 | 105.7 | 4.7 | 10.4 | 119.4 |
| Kuwait | 452.0 | 560.1 | 23.9 | 378.7 | 444.9 | 17.5 | 19.7 | 33.8 | 72.0 | 5.6 | 8.2 | 46.2 |
| El Salvador | 335.9 | 555.3 | 65.3 | 220.1 | 358.6 | 62.9 | 20.9 | 35.3 | 69.1 | 6.6 | 10.7 | 62.4 |
| Liberia | 295.4 | 552.2 | 86.9 | 194.7 | 384.8 | 97.6 | 34.0 | 59.9 | 76.1 | 8.2 | 16.9 | 107.0 |
| Central African Rep. | 324.1 | 529.1 | 63.3 | 262.6 | 421.8 | 60.6 | 25.3 | 40.6 | 60.8 | 18.1 | 27.7 | 52.7 |
| Chad | 329.0 | 526.0 | 59.8 | 137.0 | 225.7 | 64.8 | 85.8 | 135.9 | 58.3 | 18.2 | 27.8 | 52.8 |
| Estonia | 336.0 | 523.5 | 55.8 | 297.3 | 455.0 | 53.0 | 5.2 | 10.6 | 104.9 | 0.8 | 2.0 | 152.7 |
| Haiti | 291.0 | 517.1 | 77.7 | 145.6 | 258.9 | 77.8 | 22.4 | 38.4 | 71.3 | 2.8 | 5.3 | 89.3 |
| North Macedonia | 349.7 | 517.1 | 47.9 | 175.4 | 250.1 | 42.6 | 45.3 | 71.8 | 58.5 | 12.9 | 22.7 | 76.0 |
| Niger | 244.4 | 495.4 | 102.7 | 156.0 | 332.5 | 113.2 | 32.5 | 57.6 | 77.3 | 11.2 | 19.0 | 70.8 |
| Nicaragua | 292.8 | 475.5 | 62.4 | 194.5 | 309.0 | 58.9 | 12.6 | 23.3 | 84.7 | 3.7 | 6.9 | 85.2 |
| Congo | 373.8 | 473.4 | 26.6 | 309.3 | 382.6 | 23.7 | 19.0 | 28.8 | 51.2 | 9.1 | 14.6 | 59.8 |
| Kosovo | 196.0 | 455.7 | 132.6 | 121.0 | 277.4 | 129.1 | 17.5 | 39.3 | 124.5 | 5.3 | 11.3 | 112.9 |
| Trinidad and Tobago | 366.5 | 435.5 | 18.8 | 223.1 | 264.7 | 18.7 | 21.8 | 27.6 | 26.5 | 2.8 | 3.5 | 22.0 |
| Qatar | 169.6 | 434.9 | 156.4 | 169.3 | 430.1 | 154.0 | 0.1 | 3.2 | 2209.5 | 0.0 | 1.2 | 15616.6 |
| Gabon | 294.7 | 387.3 | 31.4 | 226.8 | 291.2 | 28.4 | 20.9 | 30.3 | 45.1 | 11.8 | 16.4 | 39.3 |
| Burundi | 191.3 | 334.5 | 74.9 | 143.7 | 256.3 | 78.4 | 9.8 | 16.3 | 66.9 | 2.8 | 4.8 | 72.3 |
| Singapore | 279.1 | 329.6 | 18.1 | 197.6 | 236.3 | 19.6 | 13.7 | 16.2 | 17.6 | 1.9 | 2.5 | 34.7 |
| Somalia | 150.4 | 318.4 | 111.6 | 99.3 | 201.2 | 102.7 | 17.5 | 33.5 | 91.7 | 3.7 | 6.7 | 82.3 |
| The Gambia | 152.7 | 300.5 | 96.9 | 115.6 | 223.9 | 93.7 | 3.4 | 6.5 | 94.4 | 1.2 | 1.6 | 37.7 |
| Namibia | 160.9 | 283.5 | 76.2 | 115.0 | 196.0 | 70.5 | 8.6 | 19.6 | 128.9 | 1.5 | 4.4 | 194.1 |
| Mongolia | 127.7 | 265.7 | 108.1 | 82.0 | 176.2 | 114.8 | 3.8 | 10.1 | 166.5 | 0.1 | 0.3 | 113.4 |
| Brunei Darussalam | 159.1 | 253.4 | 59.3 | 106.8 | 166.8 | 56.1 | 13.3 | 26.9 | 101.7 | 2.7 | 5.6 | 110.7 |
| Mauritania | 49.3 | 245.0 | 397.0 | 33.0 | 186.5 | 464.4 | 6.0 | 16.5 | 176.0 | 2.5 | 4.9 | 92.5 |
| Suriname | 145.8 | 228.5 | 56.8 | 57.9 | 90.6 | 56.5 | 20.2 | 34.5 | 70.7 | 2.5 | 4.3 | 76.9 |
| Guadalupe | 152.7 | 227.5 | 48.9 | 128.6 | 192.1 | 49.4 | 5.6 | 8.0 | 41.7 | 1.4 | 2.1 | 52.6 |
| Guyana | 197.1 | 223.1 | 13.2 | 89.4 | 101.6 | 13.6 | 27.0 | 31.1 | 15.0 | 4.7 | 6.0 | 27.5 |
| Réunion (Fr.) | 60.4 | 208.0 | 244.2 | 60.4 | 208.0 | 244.2 | 0.0 | 0.0 | n.a. | 0.0 | 0.0 | n.a. |
| Luxembourg | 120.8 | 206.6 | 71.0 | 92.0 | 161.5 | 75.6 | 12.8 | 19.7 | 53.1 | 6.7 | 10.2 | 51.3 |
| Guinea-Bissau | 104.4 | 206.0 | 97.4 | 98.5 | 191.3 | 94.2 | 0.3 | 1.2 | 258.8 | 0.1 | 0.3 | 409.0 |
| South Sudan | 72.2 | 203.9 | 182.3 | 50.3 | 137.5 | 173.3 | 6.5 | 24.4 | 274.1 | 2.1 | 9.2 | 333.9 |
| Martinique (Fr.) | 137.8 | 199.3 | 44.6 | 122.0 | 176.9 | 45.0 | 5.2 | 7.4 | 43.3 | 1.5 | 2.2 | 51.3 |
| Hong Kong, China | 105.4 | 195.9 | 85.8 | 76.2 | 128.9 | 69.0 | 14.7 | 36.0 | 144.5 | 8.7 | 23.4 | 167.7 |
| Fiji | 91.9 | 189.3 | 105.9 | 62.0 | 123.1 | 98.5 | 18.6 | 40.1 | 114.9 | 11.1 | 24.1 | 116.0 |
| Bahrain | 111.5 | 183.8 | 64.8 | 105.2 | 166.2 | 58.0 | 0.3 | 1.6 | 521.2 | 0.0 | 0.1 | 21915.8 |
| Equatorial Guinea | 78.8 | 181.1 | 129.9 | 59.3 | 122.3 | 106.4 | 6.0 | 16.4 | 175.1 | 2.5 | 5.8 | 129.7 |
| Montenegro | 94.6 | 176.3 | 86.5 | 54.1 | 98.2 | 81.5 | 15.4 | 30.5 | 98.0 | 7.2 | 14.1 | 96.2 |
| Papua New Guinea | 133.1 | 172.1 | 29.2 | 96.9 | 120.2 | 24.0 | 6.8 | 11.4 | 66.1 | 2.4 | 4.3 | 75.4 |
| Mauritius | 109.8 | 158.1 | 43.9 | 71.1 | 99.8 | 40.4 | 3.4 | 5.4 | 60.2 | 0.5 | 1.0 | 95.0 |
| Lesotho | 82.4 | 151.9 | 84.3 | 71.9 | 134.9 | 87.5 | 2.4 | 3.7 | 53.9 | 1.1 | 1.6 | 39.5 |
| The Bahamas | 46.3 | 118.1 | 155.3 | 26.9 | 71.0 | 164.0 | 1.9 | 7.3 | 275.6 | 0.5 | 2.5 | 412.6 |
| Barbados | 95.6 | 114.7 | 20.0 | 78.4 | 93.5 | 19.3 | 1.0 | 1.3 | 31.2 | 0.2 | 0.2 | 24.5 |
| Eswatini | 48.4 | 105.6 | 118.3 | 45.2 | 97.5 | 115.9 | 1.2 | 2.5 | 105.6 | 0.6 | 1.2 | 84.2 |
| Malta | 87.4 | 101.9 | 16.6 | 81.1 | 94.0 | 16.0 | 1.2 | 1.5 | 19.5 | 0.2 | 0.3 | 25.8 |
| Eritrea | 45.6 | 99.9 | 119.0 | 39.1 | 84.5 | 116.5 | 0.5 | 1.5 | 187.4 | 0.0 | 0.3 | 566.3 |
| Iceland | 52.5 | 99.6 | 89.6 | 41.8 | 76.1 | 81.9 | 5.4 | 10.5 | 93.4 | 3.5 | 6.4 | 84.9 |
| New Caledonia (Fr.) | 71.5 | 89.6 | 25.3 | 56.8 | 70.8 | 24.6 | 4.8 | 5.9 | 22.8 | 1.8 | 2.1 | 16.9 |
| Guam (U.S.) | 83.4 | 89.4 | 7.3 | 64.7 | 69.8 | 8.0 | 5.1 | 5.3 | 4.2 | 2.7 | 2.8 | 3.4 |
| Azores Islands (Por.) | 74.0 | 85.1 | 14.9 | 74.0 | 85.1 | 14.9 | 0.0 | 0.0 | n.a. | 0.0 | 0.0 | n.a. |
| Belize | 37.9 | 82.9 | 119.1 | 28.6 | 62.3 | 117.8 | 1.7 | 3.8 | 126.6 | 0.2 | 0.6 | 179.5 |
| Madeira Islands (Por.) | 56.5 | 78.7 | 39.2 | 50.9 | 70.6 | 38.7 | 1.0 | 1.5 | 53.8 | 0.2 | 0.4 | 78.8 |
| Timor-Leste | 46.1 | 69.8 | 51.4 | 20.0 | 30.7 | 53.5 | 6.7 | 9.3 | 38.8 | 1.2 | 1.7 | 39.6 |
| Comoros | 61.4 | 68.3 | 11.3 | 27.6 | 31.8 | 15.0 | 1.5 | 1.6 | 10.9 | 0.2 | 0.2 | 9.6 |
| French Guiana (Fr.) | 54.3 | 68.2 | 25.5 | 40.1 | 48.5 | 21.0 | 4.5 | 7.4 | 64.0 | 1.7 | 3.5 | 108.1 |
| Virgin Islands (U.S.) | 52.1 | 65.9 | 26.5 | 42.5 | 54.4 | 27.9 | 0.5 | 0.6 | 27.1 | 0.1 | 0.1 | 25.1 |
| Curaçao (Neth.) | 17.0 | 55.9 | 228.8 | 6.3 | 21.6 | 241.8 | 0.0 | 0.1 | 375.3 | 0.0 | 0.0 | n.a. |
| Saint Lucia | 29.2 | 52.8 | 81.3 | 25.2 | 45.4 | 80.4 | 1.1 | 2.3 | 108.4 | 0.3 | 0.7 | 175.3 |
| Aruba (Neth.) | 40.0 | 49.4 | 23.4 | 32.1 | 39.7 | 23.7 | 0.5 | 0.7 | 22.2 | 0.1 | 0.1 | 59.6 |
| Cape Verde | 27.8 | 44.7 | 60.6 | 24.2 | 39.2 | 62.2 | 0.6 | 0.9 | 33.5 | 0.1 | 0.1 | 29.7 |
| Djibouti | 8.5 | 41.0 | 382.5 | 7.6 | 36.2 | 375.3 | 0.1 | 0.7 | 627.6 | 0.0 | 0.1 | 472.7 |
| Cayman Islands (U.K.) | 20.2 | 37.8 | 87.0 | 12.1 | 24.0 | 98.8 | 2.5 | 4.0 | 58.5 | 0.7 | 0.9 | 33.7 |
| Saint Vincent & Grenadines | 27.1 | 32.3 | 19.3 | 19.2 | 22.9 | 19.4 | 1.9 | 2.3 | 19.9 | 0.6 | 0.8 | 20.6 |
| Jersey (U.K.) | 18.7 | 30.4 | 62.0 | 15.6 | 25.8 | 65.7 | 1.6 | 2.0 | 30.8 | 1.0 | 1.4 | 37.3 |
| Solomon Islands | 25.4 | 28.3 | 11.5 | 19.2 | 20.9 | 8.7 | 2.3 | 2.7 | 18.2 | 1.2 | 1.4 | 18.1 |
| Grenada | 19.8 | 26.5 | 33.9 | 16.9 | 22.5 | 33.0 | 0.7 | 1.0 | 38.5 | 0.2 | 0.3 | 41.2 |
| Maldives | 25.0 | 25.7 | 2.8 | 23.5 | 24.1 | 2.5 | 0.1 | 0.1 | 0.0 | 0.0 | 0.0 | 0.0 |
| Antigua and Barbuda | 19.6 | 25.0 | 27.4 | 16.2 | 20.4 | 25.7 | 0.7 | 1.1 | 42.9 | 0.2 | 0.4 | 53.4 |
| Vanuatu | 19.4 | 24.8 | 27.7 | 15.9 | 20.1 | 26.4 | 1.0 | 1.3 | 26.3 | 0.4 | 0.5 | 21.1 |
| Isle of Man (U.K.) | 13.3 | 24.1 | 80.8 | 11.2 | 19.7 | 76.5 | 1.1 | 1.8 | 60.5 | 0.7 | 1.0 | 52.3 |
| Guernsey (U.K.) | 18.0 | 24.1 | 33.5 | 13.0 | 17.7 | 36.1 | 3.2 | 3.9 | 22.5 | 2.5 | 3.1 | 21.3 |
| Dominica | 12.6 | 19.5 | 55.6 | 9.7 | 15.2 | 56.6 | 0.4 | 0.9 | 104.0 | 0.1 | 0.3 | 109.8 |
| Saint Kitts and Nevis | 13.9 | 18.7 | 35.0 | 9.2 | 12.8 | 38.5 | 0.1 | 0.1 | 24.7 | 0.0 | 0.0 | n.a. |
| Bhutan | 5.0 | 15.1 | 200.2 | 2.2 | 7.6 | 238.9 | 1.0 | 3.0 | 207.8 | 0.6 | 1.9 | 232.4 |
| Sint Maarten (Neth.) | 12.2 | 13.8 | 13.3 | 10.0 | 11.3 | 13.1 | 0.7 | 0.8 | 12.6 | 0.2 | 0.2 | 12.9 |
| Liechtenstein | 7.1 | 13.5 | 91.1 | 3.5 | 6.8 | 92.2 | 2.5 | 4.8 | 91.2 | 1.6 | 3.4 | 115.6 |
| Saint-Martin (Fr.) | 10.2 | 12.6 | 23.0 | 6.8 | 8.6 | 25.8 | 1.1 | 1.2 | 13.7 | 0.1 | 0.2 | 17.0 |
| British Virgin Islands (U.K.) | 8.6 | 11.5 | 34.4 | 7.4 | 10.0 | 34.9 | 0.0 | 0.0 | 143.9 | 0.0 | 0.0 | n.a. |
| Mayotte (Fr.) | 10.6 | 11.3 | 7.3 | 10.5 | 11.3 | 7.2 | 0.0 | 0.1 | 28.5 | 0.0 | 0.0 | 16.7 |
| San Marino | 8.2 | 11.2 | 36.6 | 7.3 | 9.9 | 35.9 | 0.5 | 0.7 | 40.2 | 0.2 | 0.2 | 39.0 |
| Anguilla (U.K.) | 8.1 | 9.6 | 17.7 | 7.4 | 8.6 | 17.5 | 0.3 | 0.3 | 14.3 | 0.1 | 0.1 | 14.7 |
| Macau, China | 5.8 | 8.6 | 48.6 | 5.7 | 7.9 | 39.7 | 0.0 | 0.4 | 1106.3 | 0.0 | 0.3 | n.a. |
| Bonaire (Neth.) | 2.0 | 7.2 | 260.1 | 1.1 | 4.6 | 309.6 | 0.1 | 0.2 | 43.0 | 0.0 | 0.0 | 56.9 |
| Andorra | 1.4 | 4.6 | 233.8 | 0.8 | 2.1 | 179.2 | 0.4 | 1.7 | 315.5 | 0.3 | 1.3 | 281.9 |
| Saint Barthélemy (Fr.) | 3.2 | 3.7 | 15.6 | 3.1 | 3.5 | 15.3 | 0.0 | 0.0 | n.a. | 0.0 | 0.0 | n.a. |
| Saint-Pierre-et-Miquelon (Fr.) | 2.3 | 3.0 | 26.7 | 1.8 | 2.3 | 31.8 | 0.3 | 0.3 | 9.7 | 0.1 | 0.1 | 25.4 |
| Gibraltar (U.K.) | 2.3 | 2.6 | 10.2 | 1.7 | 1.8 | 5.7 | 0.0 | 0.0 | n.a. | 0.0 | 0.0 | n.a. |
| Monaco | 1.5 | 1.7 | 13.8 | 1.5 | 1.7 | 13.9 | 0.0 | 0.0 | n.a. | 0.0 | 0.0 | n.a. |
| Turks & Caicos Islands (U.K.) | 0.4 | 1.5 | 255.2 | 0.4 | 1.3 | 240.7 | 0.0 | 0.0 | 366.1 | 0.0 | 0.0 | n.a. |
| Sint Eustatius (Neth.) | 1.3 | 1.4 | 10.0 | 1.3 | 1.4 | 9.6 | 0.0 | 0.0 | n.a. | 0.0 | 0.0 | n.a. |
| Montserrat (U.K.) | 0.8 | 0.9 | 22.9 | 0.7 | 0.9 | 22.3 | 0.0 | 0.0 | n.a. | 0.0 | 0.0 | n.a. |
| Vatican City | 0.3 | 0.4 | 7.1 | 0.3 | 0.4 | 7.3 | 0.0 | 0.0 | 0.0 | 0.0 | 0.0 | n.a. |
| Saba (Neth.) | 0.3 | 0.3 | 18.9 | 0.2 | 0.3 | 22.3 | 0.0 | 0.0 | n.a. | 0.0 | 0.0 | n.a. |
